# Supplementary material
Source: publisher site journal article supplement (https://bdj.pensoft.net/article/download/suppl/7822516/)
Supplement: Supplementary file

Supplementary Table S5. The 5 categories of multiplier used by Saito and Atobe (1970) to represent surface area covered by macroalgal species on a small sub-quadrat.

| Algal cover                                                    | Illustration                                                                        | Multiplier ( $C_n$ ) |
|----------------------------------------------------------------|-------------------------------------------------------------------------------------|----------------------|
| Covering $\frac{1}{2}$ to 1 of substratum surface              | 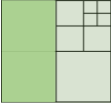 | 3.0                  |
| Covering $\frac{1}{4}$ to $\frac{1}{2}$ of substratum surface  |  | 1.5                  |
| Covering $\frac{1}{8}$ to $\frac{1}{4}$ of substratum surface  |  | 0.75                 |
| Covering $\frac{1}{16}$ to $\frac{1}{8}$ of substratum surface |  | 0.375                |
| Covering less than $\frac{1}{16}$ of substratum surface        |  | 0.1875               |
